# Supplementary figures and images for: Development of an E. coli strain for one-pot biofuel production from ionic liquid pretreated cellulose and switchgrass
Source: Royal Society of Chemistry journal article supplement (doi:10.1039/c6gc00642f), 2016-01-01

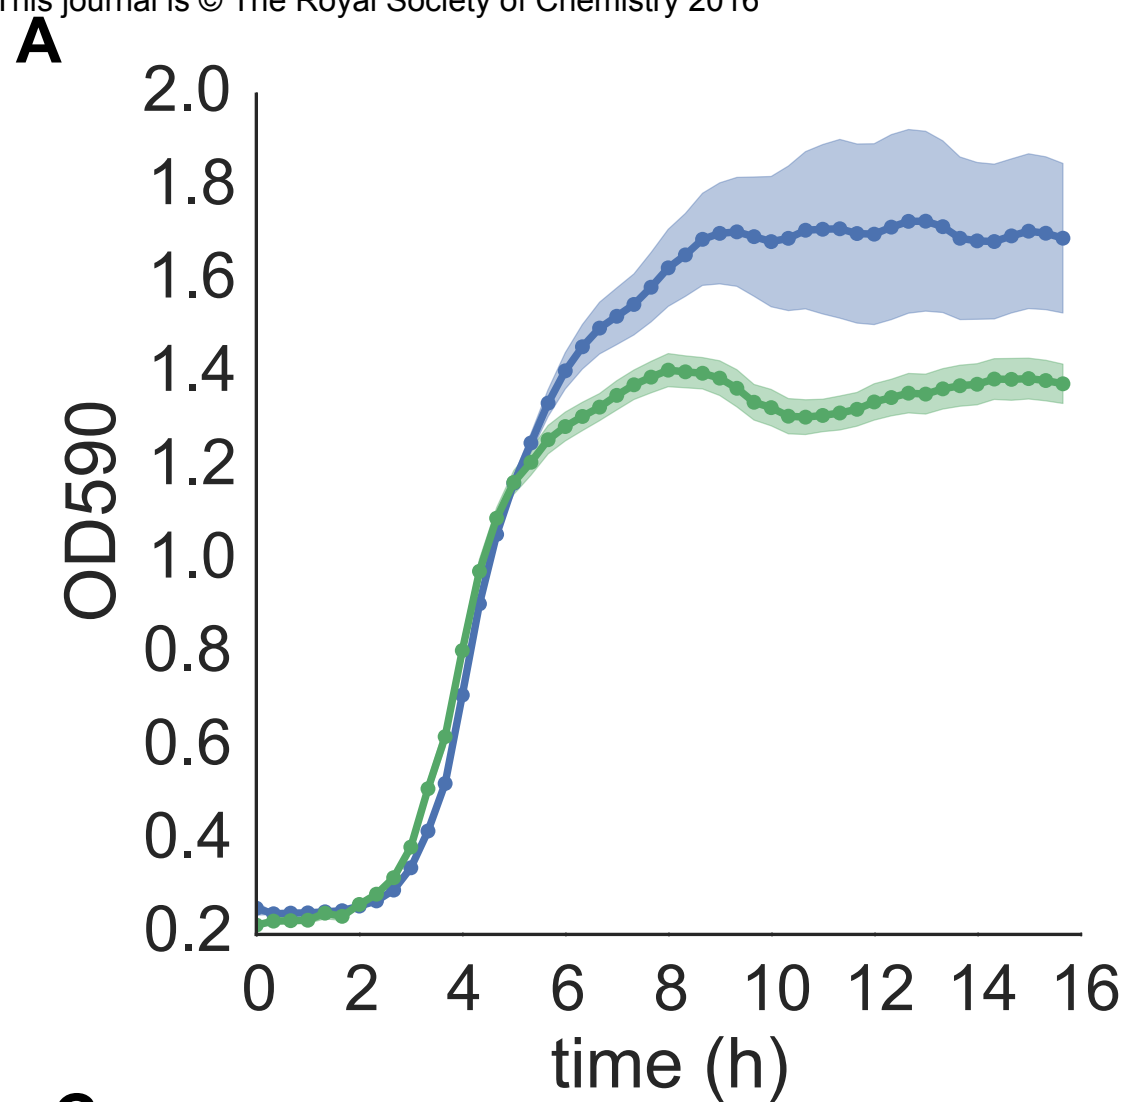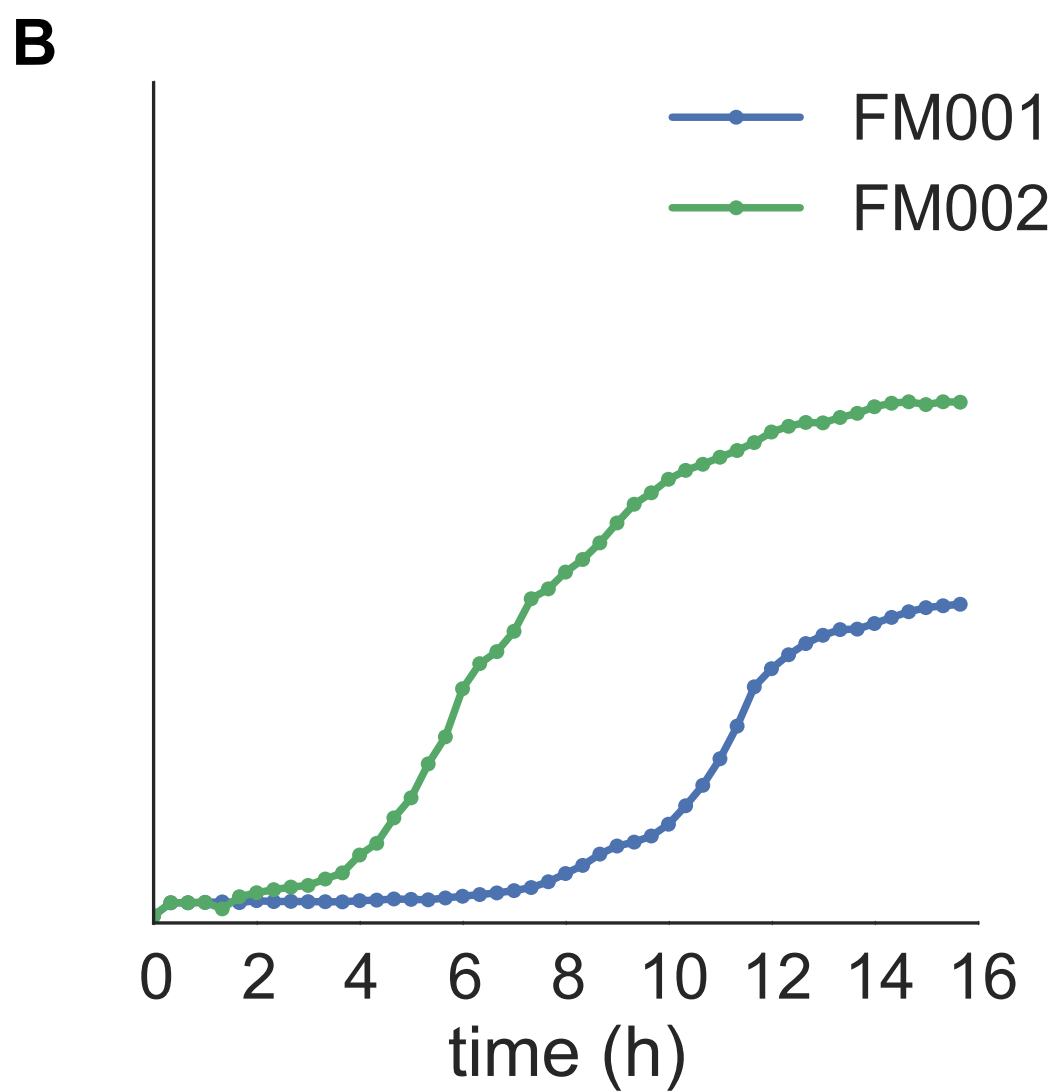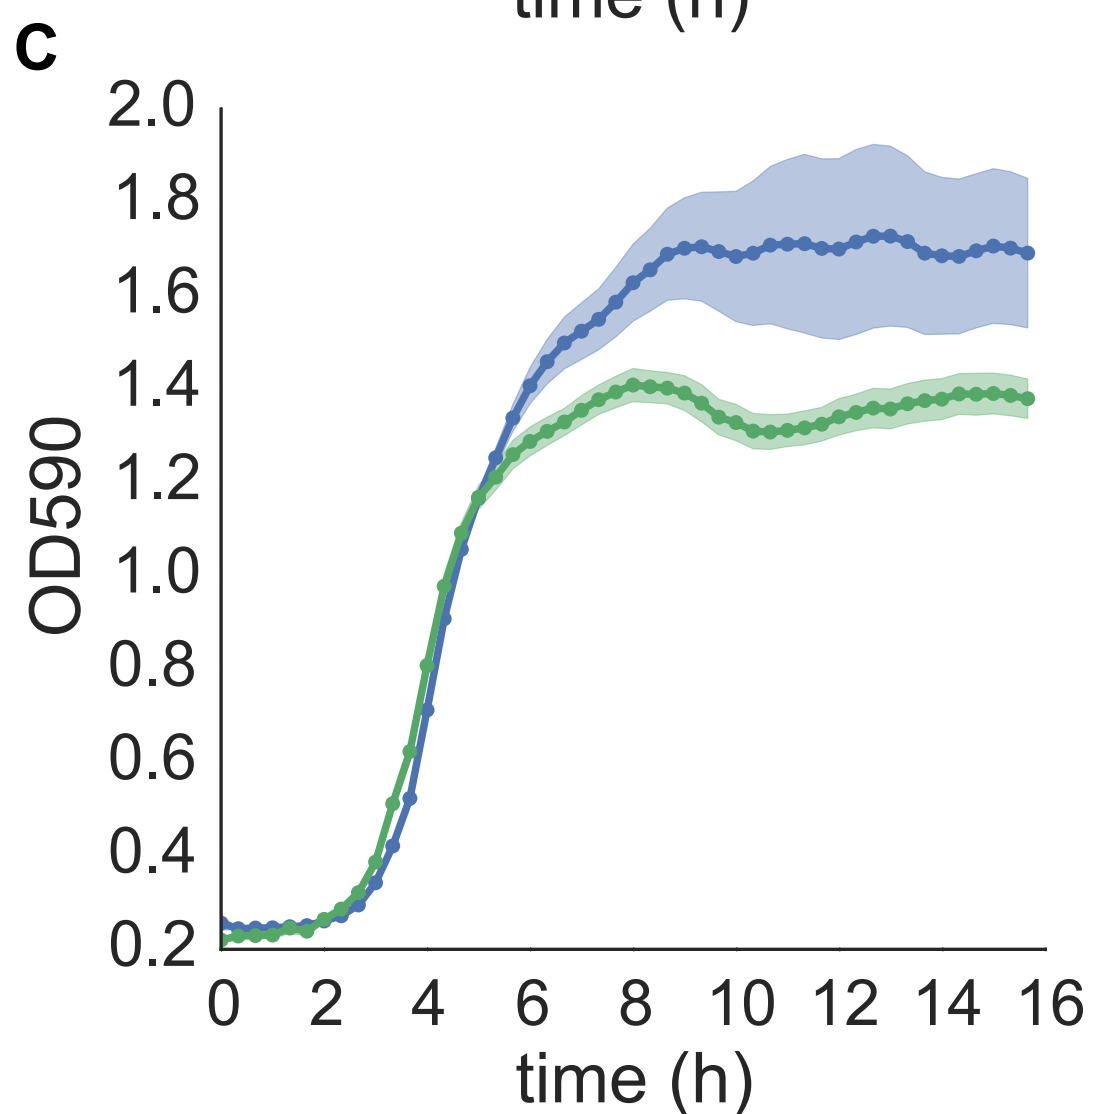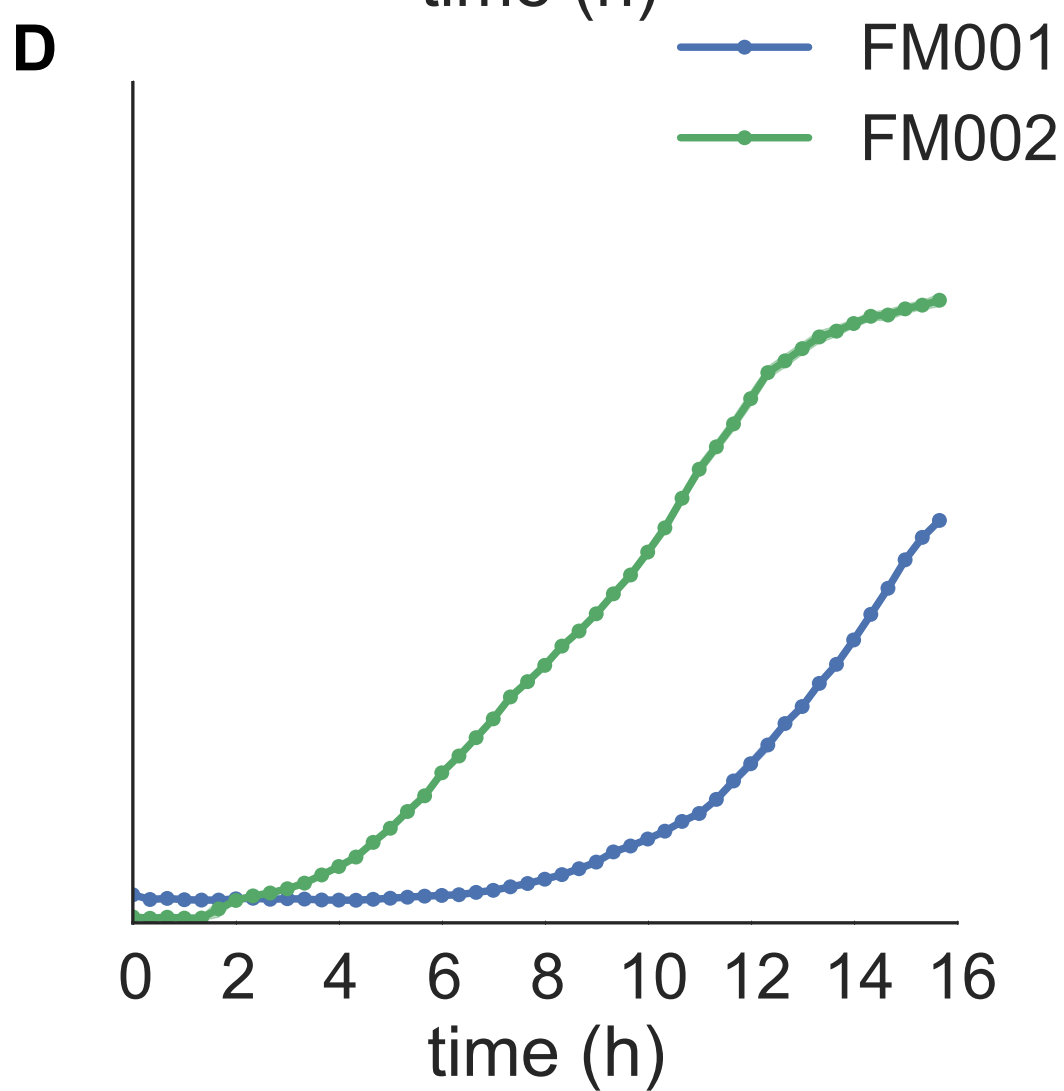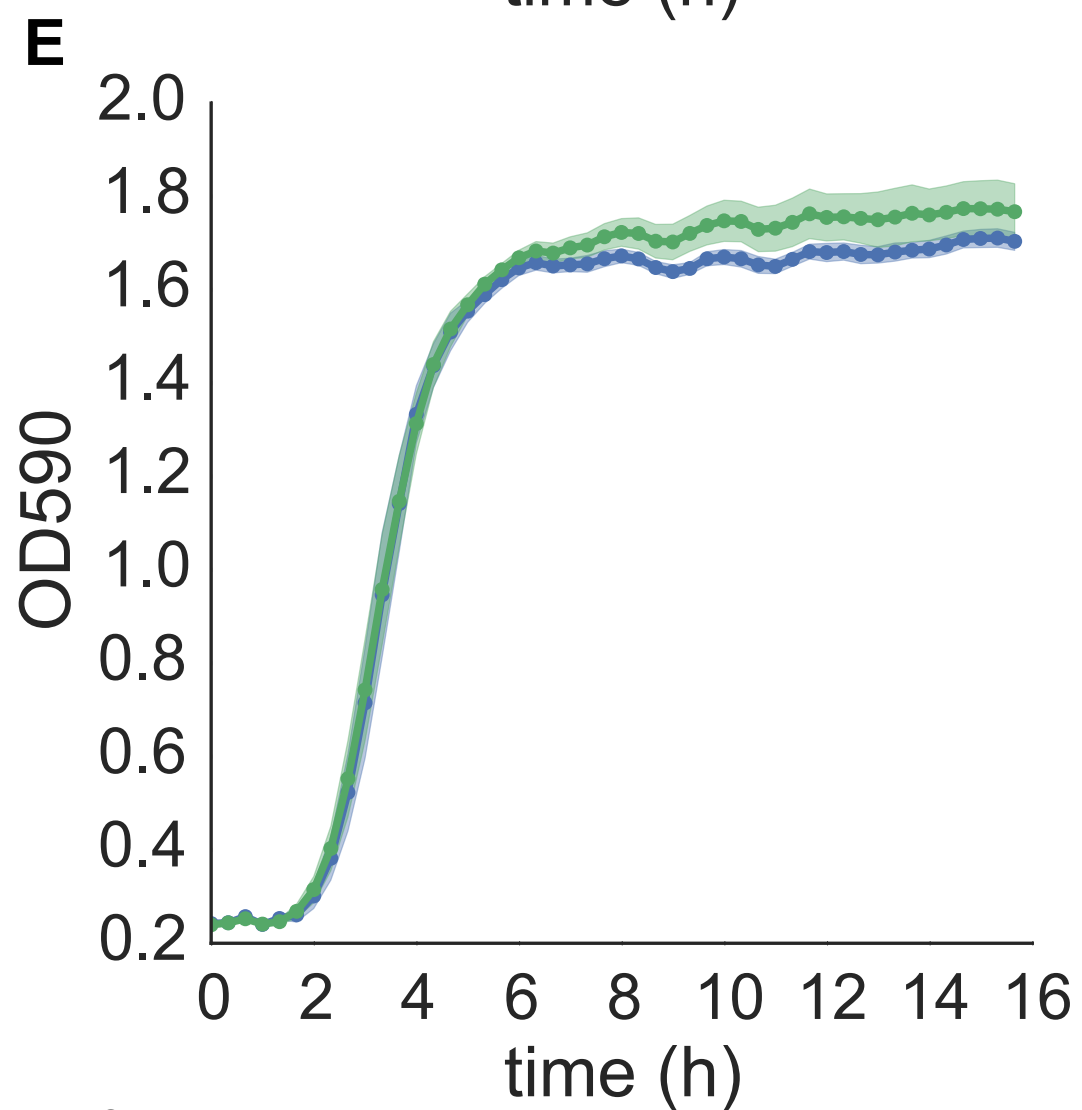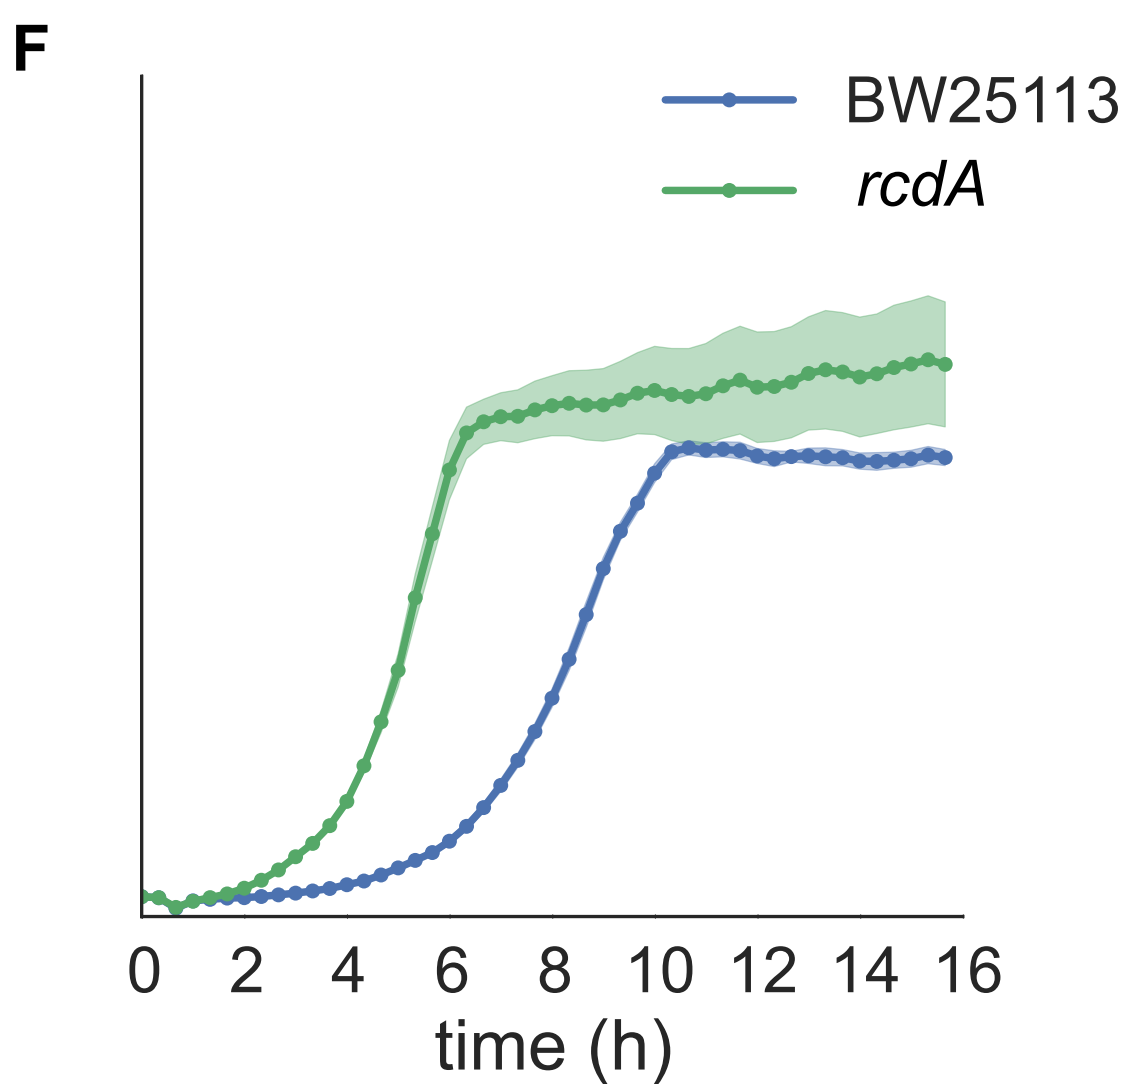

Supplement: c6gc00642f1.pdf [file c6gc00642f1.pdf]

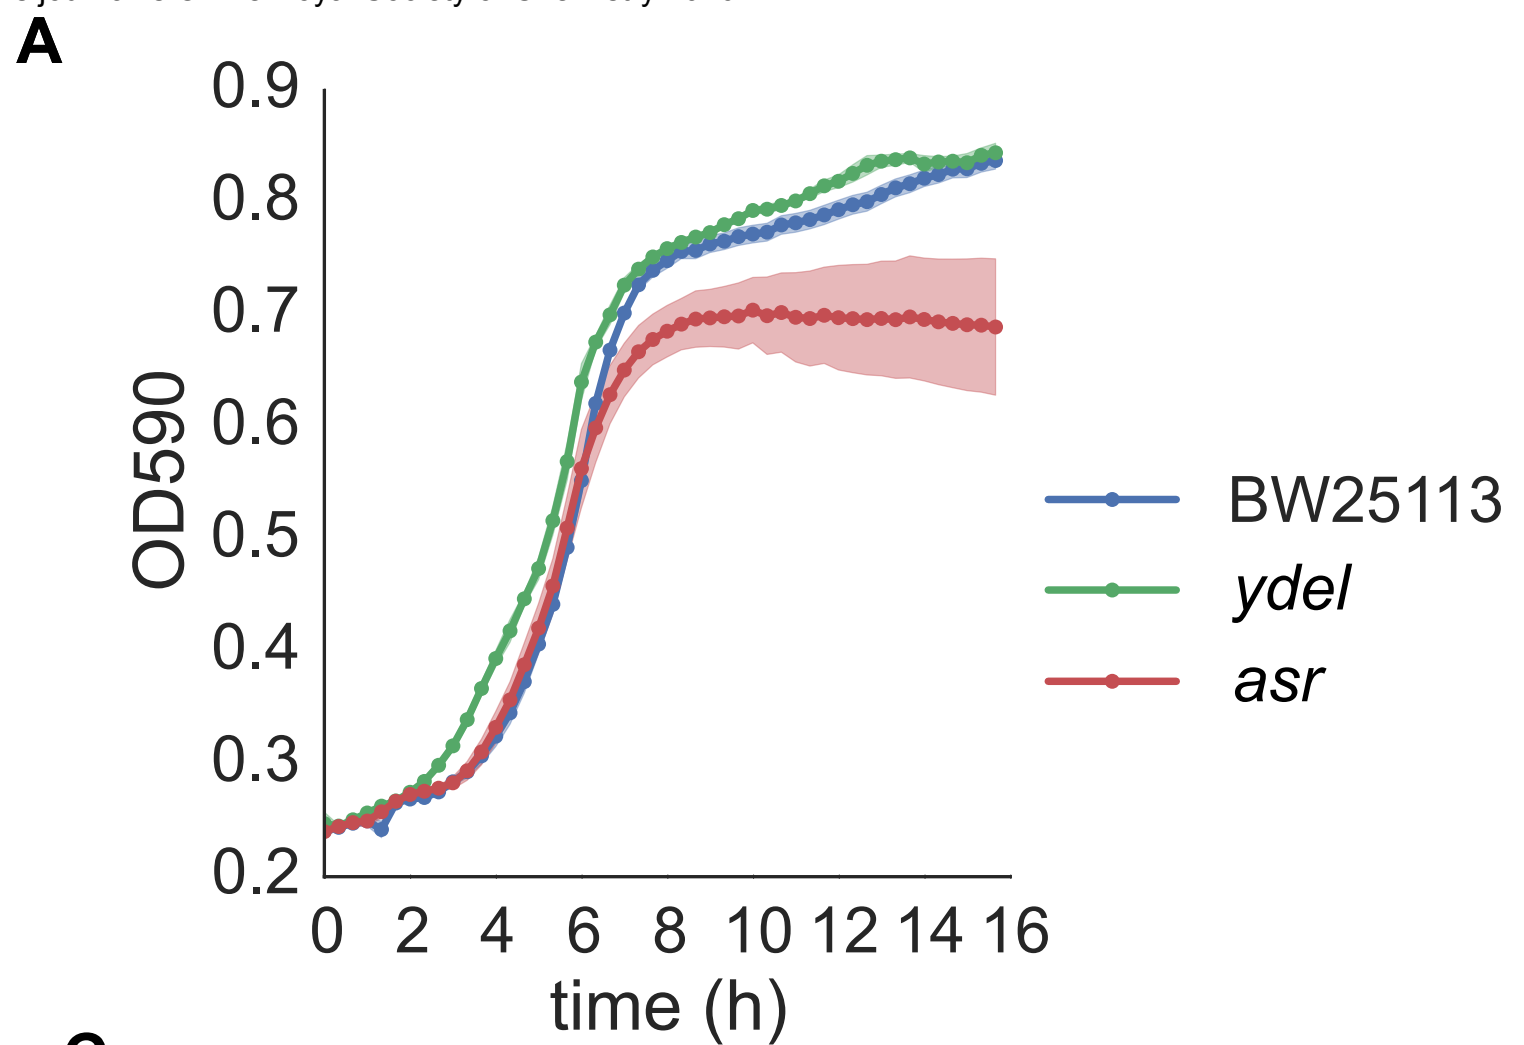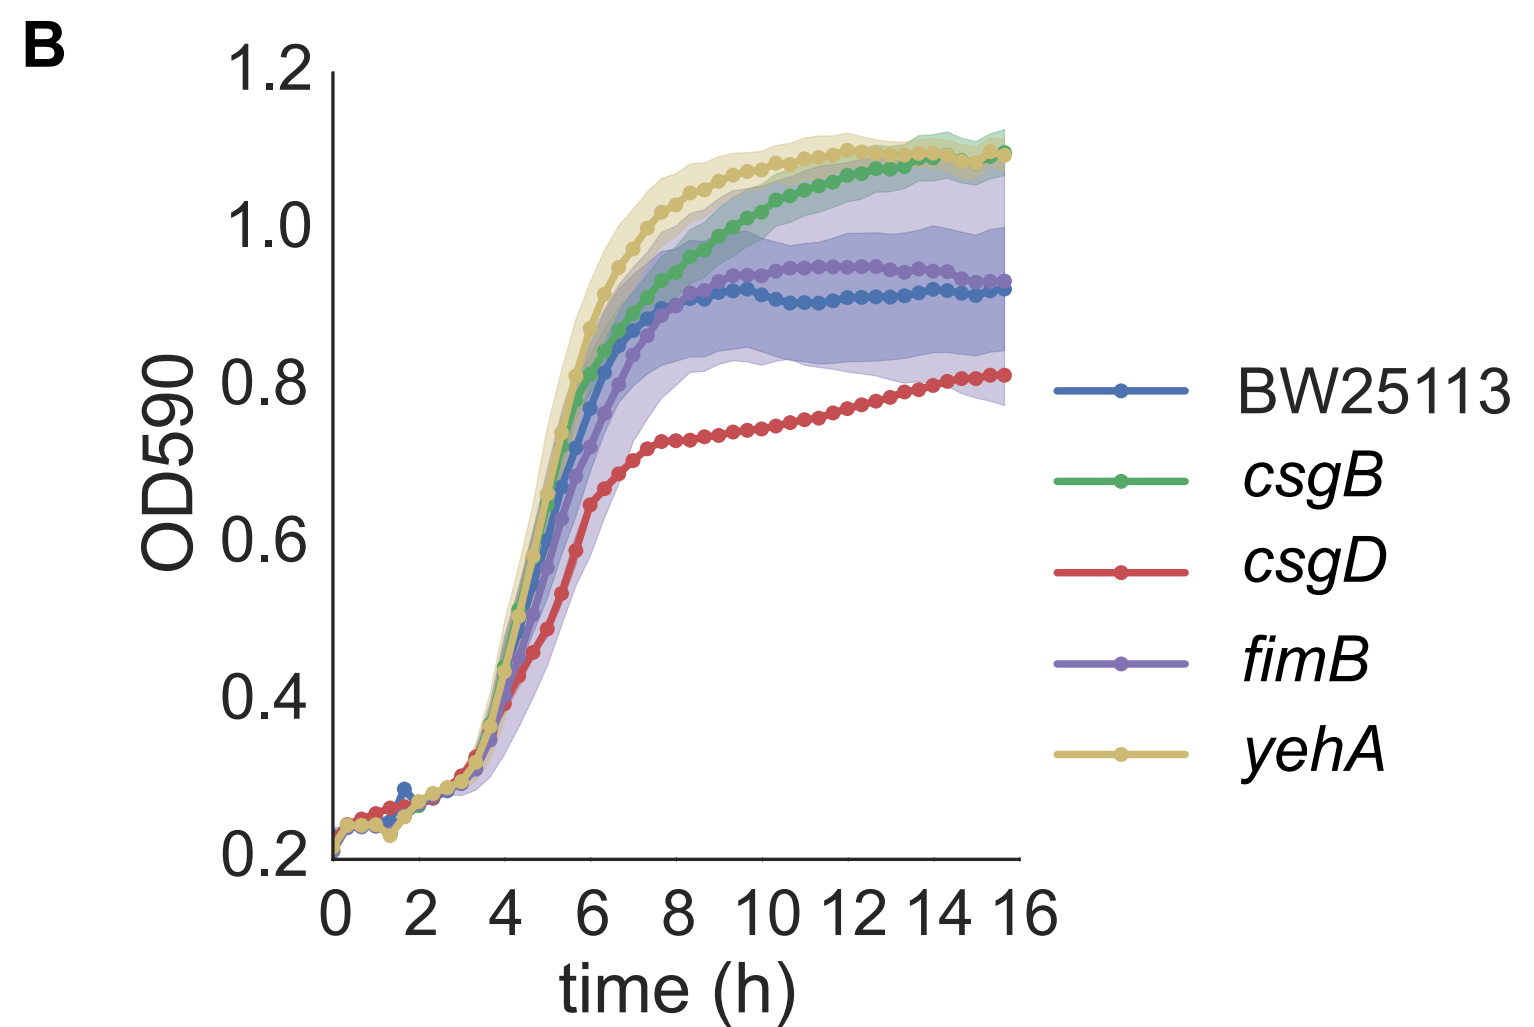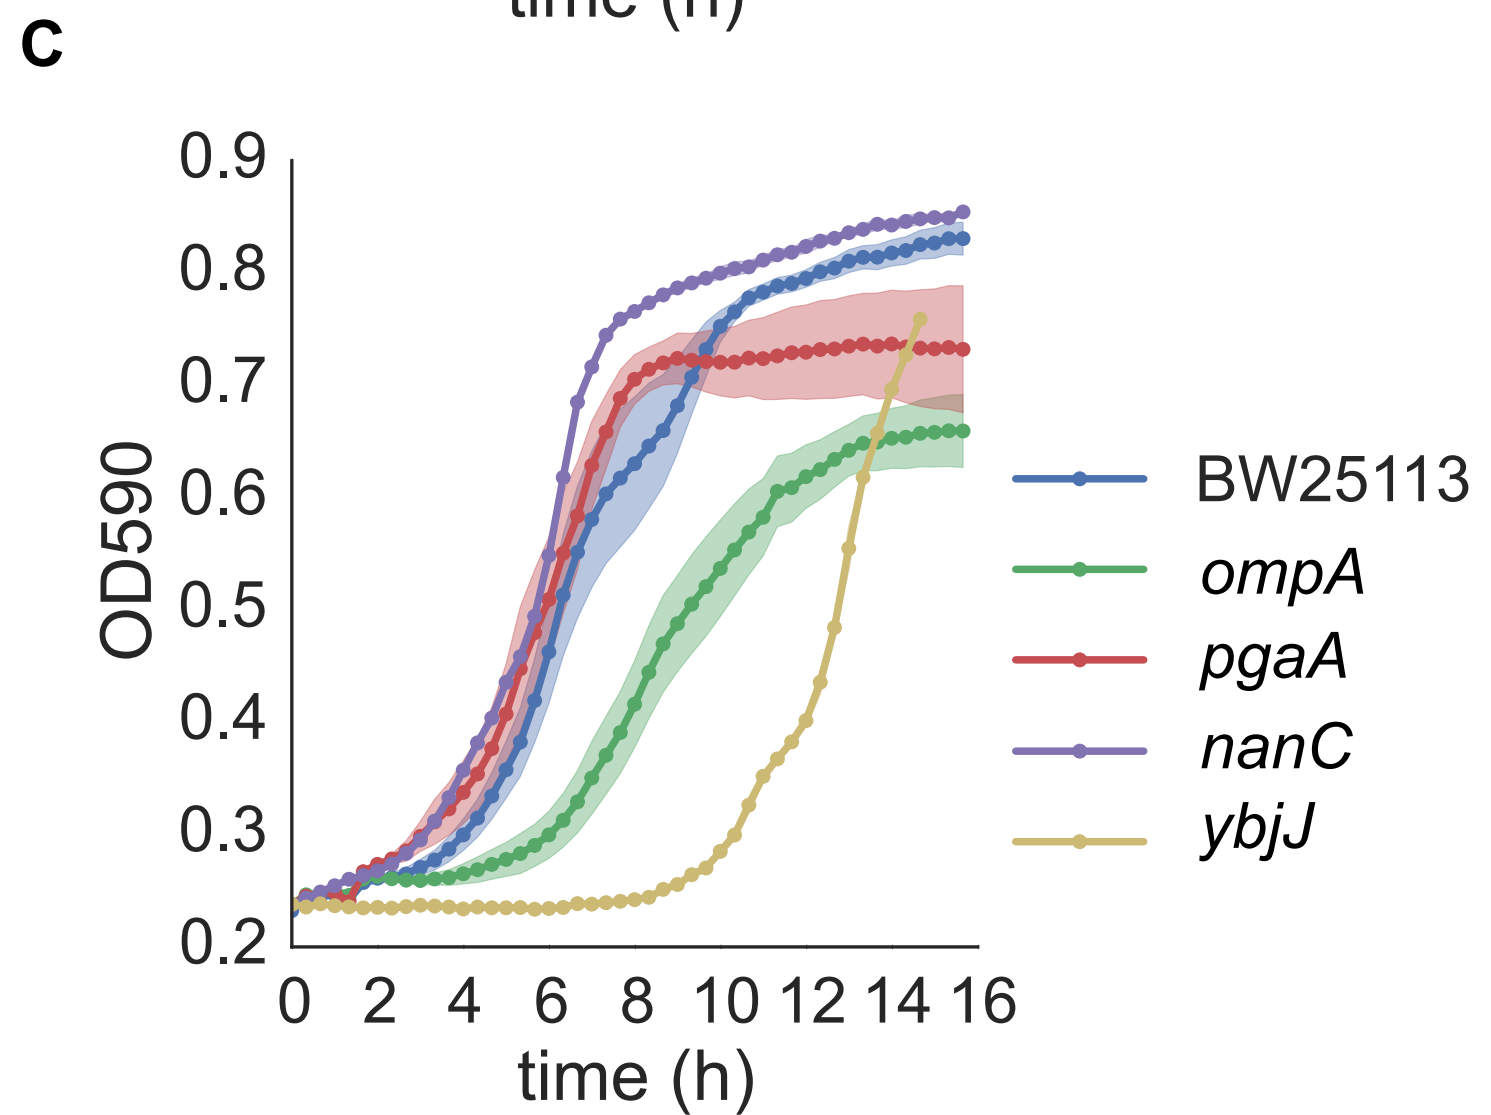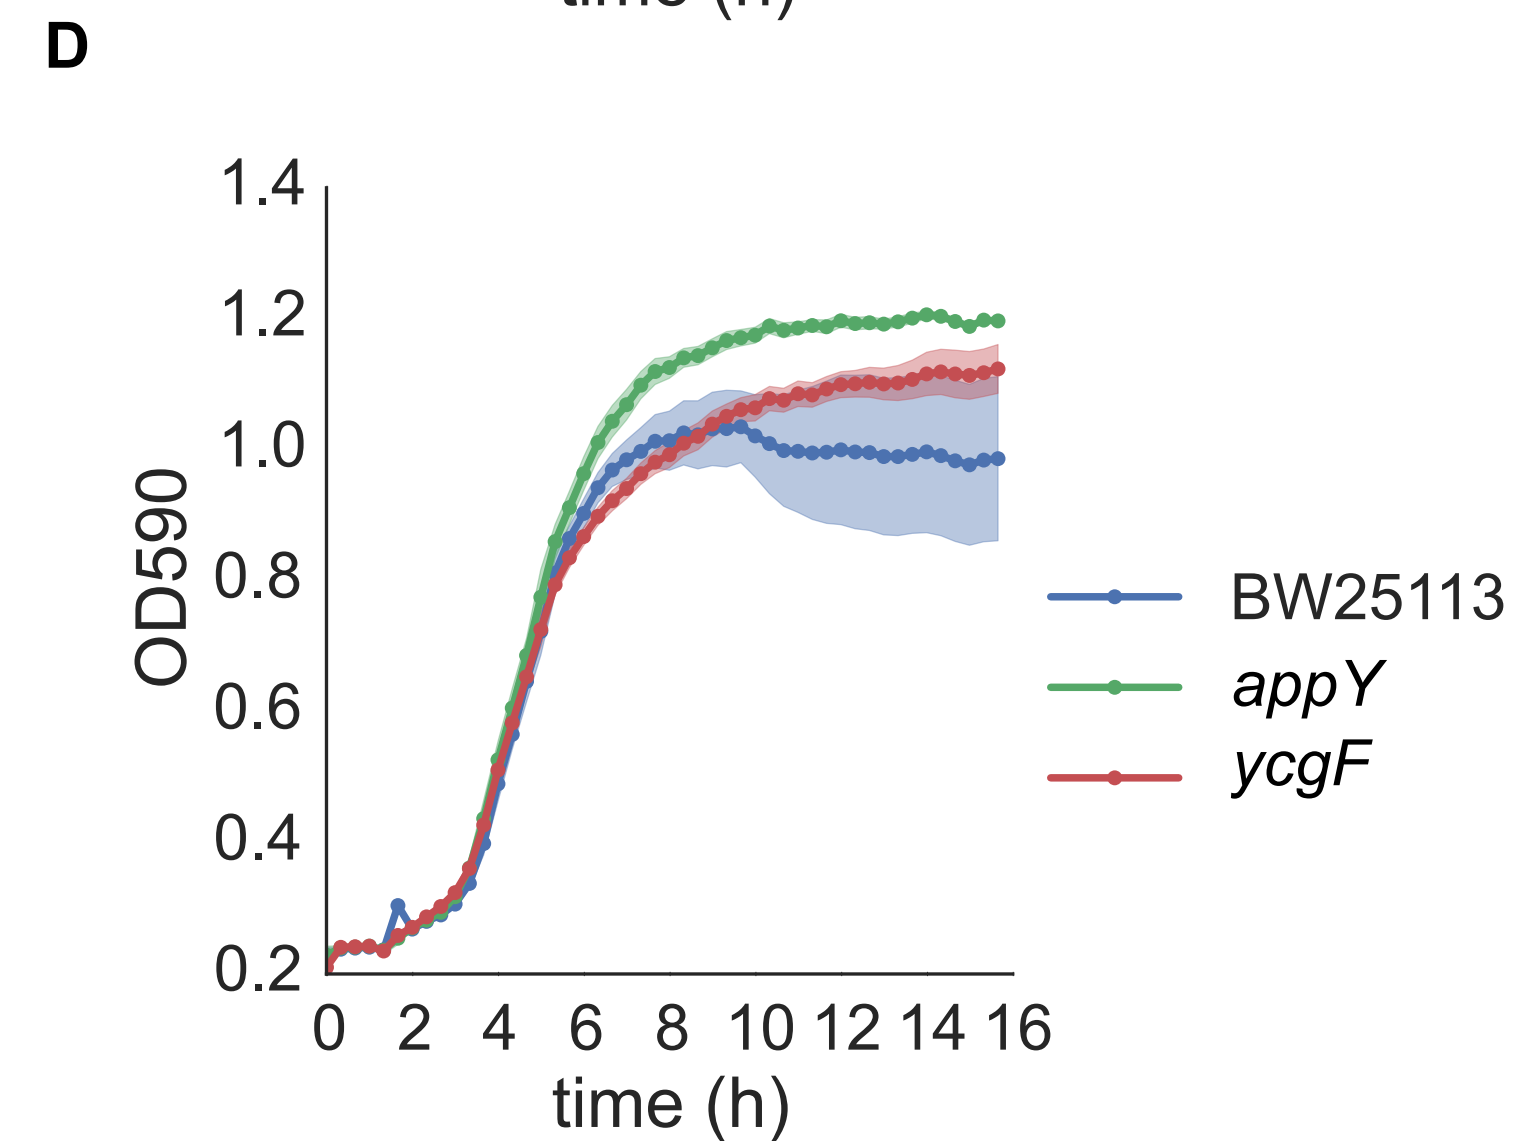

Supplement: c6gc00642f2.pdf [file c6gc00642f2.pdf]

**A**

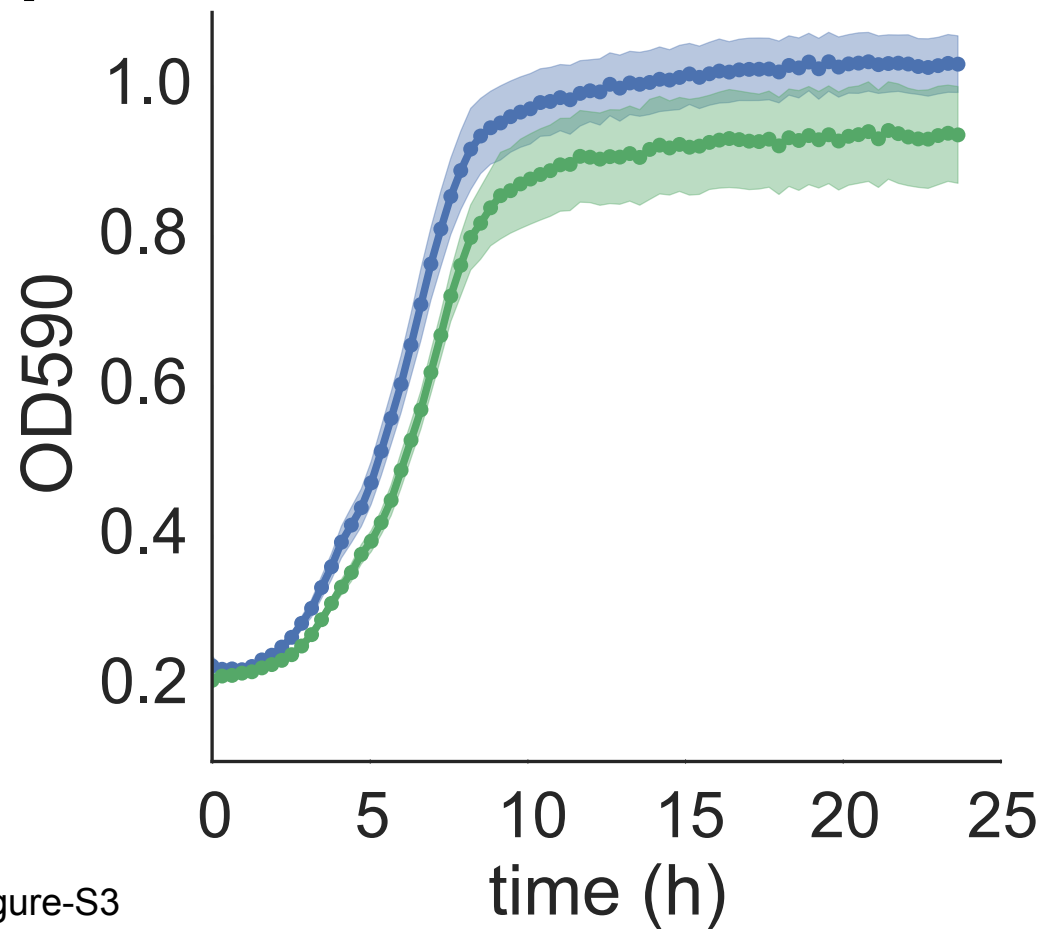

**B**

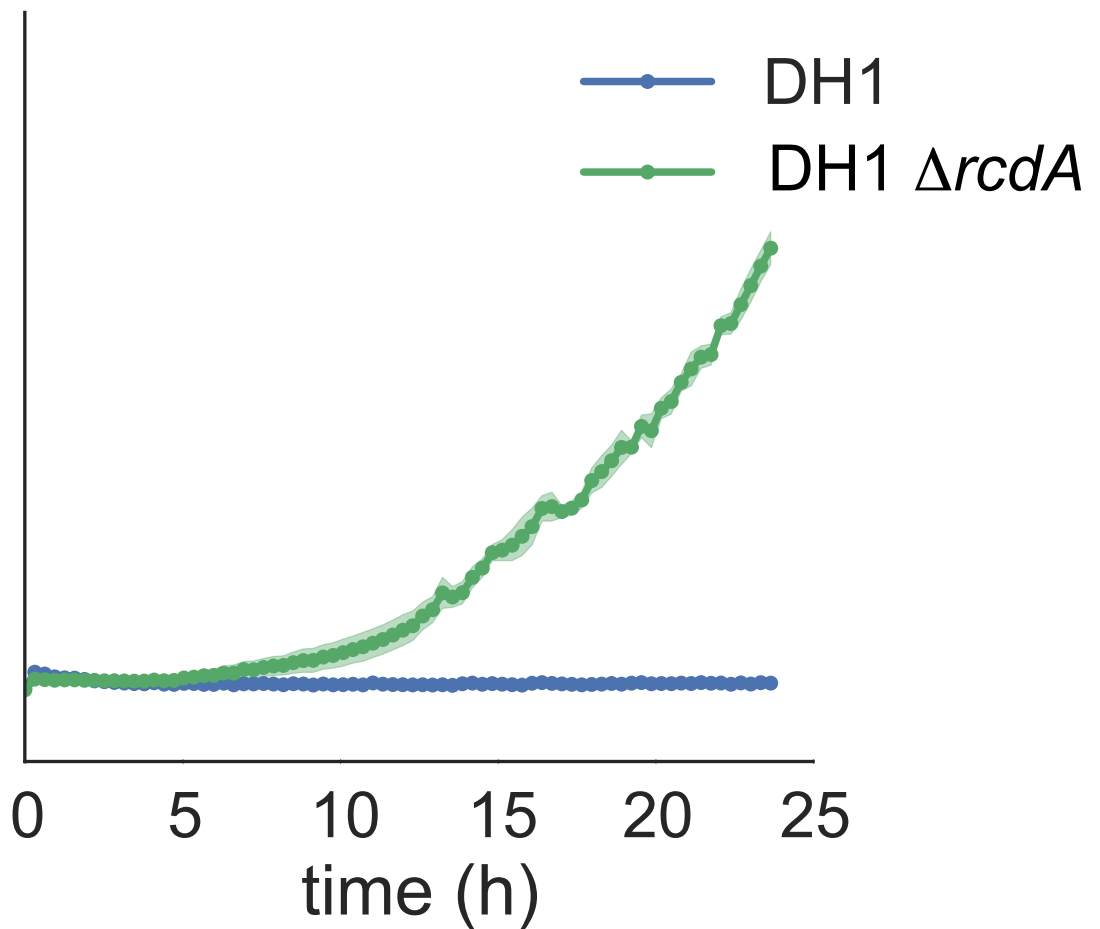

Figure-S3

Supplement: c6gc00642f3.pdf [file c6gc00642f3.pdf]
